# Supplementary material
Source: MDPI journal article supplement (https://www.mdpi.com/2504-477X/8/3/85)
Supplement: s1 [file s1]

Supplementary

## Chitosan-Based Hierarchical Scaffolds Crosslinked with Genipin

Lya Piaia <sup>1,2</sup>, Simone S. Silva <sup>3,4,\*</sup>, Emanuel M. Fernandes <sup>3,4,\*</sup>, Joana M. Gomes <sup>3,4</sup>, Albina R. Franco <sup>3,4</sup>, Isabel B. Leonor <sup>3,4</sup>, Márcio C. Fredel <sup>2,5</sup>, Gean V. Salmoria <sup>1,6</sup>, Dachamir Hotza <sup>2,5</sup> and Rui L. Reis <sup>3,4</sup>

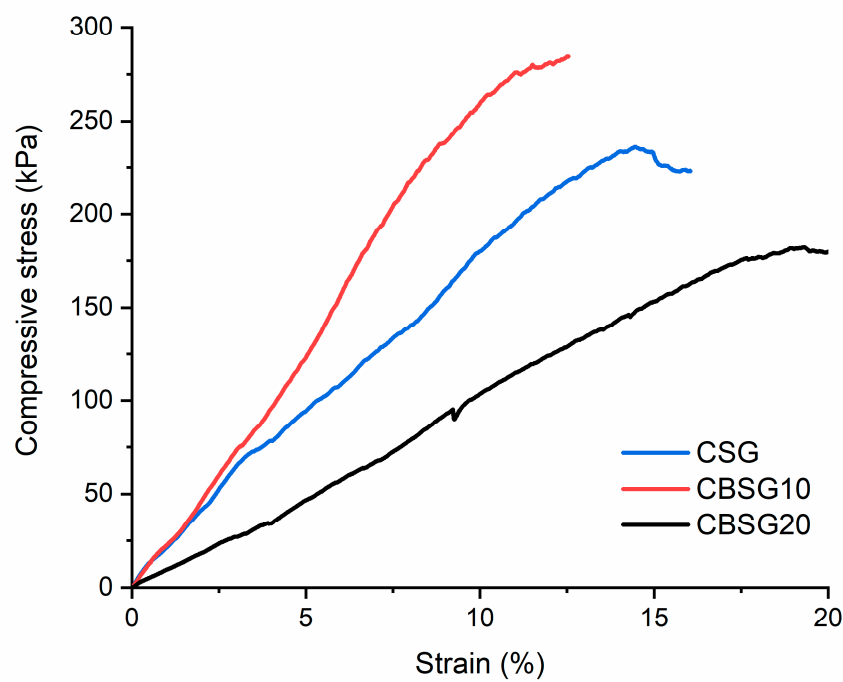

**Figure S1:** Stress-strain curves of the developed scaffolds.
